# Supplementary material for: Virtual and augmented reality gamification of visuospatial neglect treatment: therapists’ user experience
Source: Springer Nature journal article supplement (doi:10.1186/s44247-024-00061-4), 2024-02-08
Supplement: 44247_2024_61_MOESM1_ESM.pdf [file 44247_2024_61_MOESM1_ESM.pdf]

# Additional file 1 Survey that was filled out for each game

| Survey                                                                                                                                                                                                                                                                         |
|--------------------------------------------------------------------------------------------------------------------------------------------------------------------------------------------------------------------------------------------------------------------------------|
| <p>1. What is your occupation within the rehabilitation center?</p> <p>Free text box</p>                                                                                                                                                                                       |
| <p>2. Do you have experience with diagnosing and/or treating visuospatial neglect?</p> <p>Yes, treatment.</p> <p>Yes, diagnostics.</p> <p>Yes, treatment and diagnostics.</p> <p>No</p>                                                                                        |
| <p>3. Do you have experience with the following technology?</p> <p>(1 =very poor - 5 = very good)</p> <p>Computer</p> <p>Virtual Reality</p> <p>Augmented Reality</p> <p>Consoles (e.g. Nintendo)</p>                                                                          |
| <p>4. How would you rate the game?</p> <p>Preference</p> <p>Difficulty</p> <p>Implementation</p> <p>Duration</p>                                                                                                                                                               |
| <p>5. How would you rate the game content?</p> <p>(1 =very poor - 5 = very good)</p> <p>Graphics</p> <p>Sounds</p> <p>Theme</p> <p>Variation in quests</p> <p>Instructions</p>                                                                                                 |
| <p>6. How would the game content pique your interest more?</p> <p>Free text box</p>                                                                                                                                                                                            |
| <p>7. Do you want to see how the patient had played the game?</p> <p>Yes</p> <p>No</p>                                                                                                                                                                                         |
| <p>8. How would you like to see how the patient had played the game?</p> <p>Free text box</p>                                                                                                                                                                                  |
| <p>9. Is it clear what instructions you need to give? If not, how do you want to receive extra information about instructions?</p> <p>Yes</p> <p>No, I would like to receive extra information thus:</p>                                                                       |
| <p>10. What are the possibilities for using the game? Multiple answers possible.</p> <p>The patient can play the game autonomously</p> <p>The game can be played during therapy</p> <p>The patient can play the game with the help of an informal care giver</p> <p>Other:</p> |
| <p>11. How can the game be used in the rehabilitation center?</p>                                                                                                                                                                                                              |
| <p>12. What are the greatest obstacles using the game? Multiple answers possible.</p> <p>Duration</p> <p>Patient cannot play the game individually</p> <p>Unclear instructions</p> <p>Costs/finance</p> <p>Space/location</p> <p>Other:</p>                                    |
| <p>13. What is important to decide to implement the game for the rehabilitation for patients with visuospatial neglect?</p>                                                                                                                                                    |
| <p>14. Would you recommend the game to your colleagues within rehabilitation medicine?</p>                                                                                                                                                                                     |
