# Supplementary material for: Virtual and augmented reality gamification of visuospatial neglect treatment: therapists’ user experience
Source: Springer Nature journal article supplement (doi:10.1186/s44247-024-00061-4), 2024-02-08
Supplement: 44247_2024_61_MOESM2_ESM.pdf [file 44247_2024_61_MOESM2_ESM.pdf]

## Additional file 2 Coding scheme based on qualitative data

| Code                  |                                   | AR Virtual Museum | VR HEMI-RehApp | AR Balloon Popping | f Total | n |
|-----------------------|-----------------------------------|-------------------|----------------|--------------------|---------|---|
| 777                   | Residual category                 | 5                 | 4              | 4                  | 13      | 5 |
| 888                   | Not interpretable                 | 1                 | 1              | 4                  | 6       | 4 |
| 999                   | No answer                         | 12                | 5              | 17                 | 34      | 9 |
| <b>1. Positive</b>    |                                   |                   |                |                    |         |   |
| 1                     | Residual                          | 0                 | 0              | 0                  | 0       | 0 |
| 1.1                   | Overall                           | 5                 | 1              | 1                  | 7       | 4 |
| 1.2                   | Instructions                      | 0                 | 0              | 0                  | 0       | 0 |
| 1.3                   | Feedback / Reward                 | 0                 | 0              | 0                  | 0       | 0 |
| 1.4                   | Motivation                        | 1                 | 1              | 1                  | 3       | 3 |
| 1.5                   | Difficulty / Challenge            | 0                 | 1              | 0                  | 1       | 1 |
| 1.6                   | Applicability                     | 0                 | 0              | 1                  | 1       | 1 |
| 1.6.1                 | Multi-purposed                    | 1                 | 1              | 3                  | 5       | 4 |
| 1.6.2                 | Motor rehabilitation              | 0                 | 0              | 2                  | 2       | 2 |
| 1.6.3                 | Neglect rehabilitation            | 4                 | 0              | 3                  | 7       | 7 |
| 1.6.4                 | Psychoeducation                   | 0                 | 0              | 2                  | 2       | 2 |
| 1.6.5                 | Therapy with help of therapist    | 2                 | 2              | 1                  | 5       | 3 |
| 1.6.6                 | Play autonomously                 | 1                 | 1              | 2                  | 4       | 2 |
| 1.7                   | Flexibility /Variation            | 0                 | 0              | 0                  | 0       | 0 |
| <b>2. Negative</b>    |                                   |                   |                |                    |         |   |
| 2                     | Residual                          | 0                 | 0              | 0                  | 0       | 0 |
| 2.1                   | General                           | 3                 | 1              | 5                  | 9       | 7 |
| 2.2                   | Instructions                      | 0                 | 2              | 4                  | 6       | 4 |
| 2.3                   | Feedback / Reward                 | 0                 | 1              | 0                  | 1       | 1 |
| 2.4                   | Motivation                        | 3                 | 0              | 0                  | 3       | 3 |
| 2.5                   | Difficulty / Challenge            | 1                 | 1              | 1                  | 3       | 3 |
| 2.6                   | Applicability                     | 0                 | 0              | 0                  | 0       | 0 |
| 2.6.1                 | Play autonomously                 | 0                 | 0              | 0                  | 0       | 0 |
| <b>3. Suggestions</b> |                                   |                   |                |                    |         |   |
| 3                     | Residual                          | 0                 | 0              | 0                  | 0       | 0 |
| 3.1                   | Not usable yet, has potential     | 3                 | 3              | 4                  | 10      | 3 |
| 3.1.1                 | Versatile                         | 0                 | 2              | 2                  | 4       | 4 |
| 3.1.1.1               | Motor disabilities                | 2                 | 1              | 2                  | 5       | 4 |
| 3.1.1.2               | Cognitive disabilities            | 0                 | 2              | 1                  | 3       | 3 |
| 3.1.1.3               | Other disabilities                | 0                 | 0              | 3                  | 3       | 3 |
| 3.1.2                 | Theme / Game content              | 2                 | 1              | 0                  | 4       | 3 |
| 3.1.3                 | Difficulty / Challenge            | 0                 | 1              | 0                  | 1       | 1 |
| 3.1.4                 | Instructions                      | 0                 | 2              | 1                  | 3       | 2 |
| 3.1.5                 | Feedback / Reward                 | 4                 | 1              | 1                  | 6       | 3 |
| 3.1.6                 | Other suggestions for improvement | 1                 | 0              | 2                  | 4       | 3 |

|       |                                             |   |   |    |    |   |
|-------|---------------------------------------------|---|---|----|----|---|
| 3.1.7 | Flexibility /Variation                      | 4 | 1 | 2  | 7  | 4 |
| 3.2   | Need for assistance for the game            | 4 | 3 | 11 | 18 | 6 |
| 3.3   | Need for insights of game performance       | 1 | 1 | 4  | 6  | 4 |
| 3.3.1 | Accuracy                                    | 3 | 3 | 6  | 12 | 7 |
| 3.3.2 | Duration                                    | 2 | 2 | 4  | 8  | 5 |
| 3.3.3 | Search strategy / Movement / Gaze direction | 4 | 2 | 3  | 9  | 6 |
| 3.3.4 | Other innovative outcome measures           | 2 | 1 | 2  | 5  | 3 |

Note: Frequency of code appearance is displayed split per game and the portion of n=13 therapists that mentioned the code is displayed in the last column.
